# Supplementary material for: Community health center provider ability to identify, treat and account for the social determinants of health: a card study
Source: BMC Fam Pract. 2016 Aug 27;17(1):121. doi: 10.1186/s12875-016-0526-8 (PMC5002327; doi:10.1186/s12875-016-0526-8)
Supplement: Additional file 3: — Card data by location. Description of data: Data is broken down by location to show each card that was completed. Each CHC site has two corresponding data sheets. The first sheet contains the raw data including totals which show how many SDH was recorded. The second sheet contains tables with counts for each SDH and how often it was billed and/or diagnosed. (XLSX 235 kb) [file 12875_2016_526_MOESM3_ESM.xlsx]

## Sheet: California - Raw
SPECIALTY	CARD #	LANGUAGE	LG Counseling	LG Bill	LG Dx	LG Effect	IMMIGRATION	IM COUNSELING	IM Bill	IM Dx	IM Effect	MIGRANT	MG Counseling	MG Bill	MG Dx	MG Effect	POVERTY	PO Counseling	PO Bill	PO Dx	PO Effect	NEAR POV	NP Counseling	NP Bill	NP Dx	NP Effect	FOOD INSECURE	FI Counseling	FI Bill	FI Dx	FI Effect	EDUCATIONAL LIMITATIONS	ED Counseling	ED Bill	ED Dx	ED Effect	TRANSPORTATION ISSUES	TR Coounseling	TR Bill	TR Dx	TR Effects	CULTURAL BELIEFS	CB Counseling	CB Bill	CB Dx	CB Effect	NEIGHBORHOOD SAFETY	NS Counseling	NS Bill
PEDS	1																1										1				Needs Pediasure to thrive, having difficutlty getting through WIC/Insurance
PEDS	2	1
PEDS	3
PEDS	4
PEDS	5
PEDS	6	1															1															1
PEDS	7																					1	1			Obesity
PEDS	8
PEDS	9																																				1	1			Delay in getting meds
PEDS	10																																				1	1			Delay in getting appts
PEDS	11
PEDS	12																																				1	1			Missing appt
PEDS	13	1															1																														1
PEDS	14																																				1	1			Delay in starting x
PEDS	15																															1	1			Refusing therapy
PEDS	16																																														1
PEDS	17
PEDS	18																					1				$ to come to clinic appt											1
PEDS	19
PEDS	20
PEDS	21
PEDS	22	1	1			Stress in family
PEDS	23																					1	1			Obesity
PEDS	24																1	1			Eating processed food
PEDS	25																																				1				Pt lives in Visalia, family one has 1 car
PEDS	26																					1				Denies any barriers to access
PEDS	27																					1															1										1
PEDS	28
PEDS	29
PEDS	30
PEDS	31	1															1																				1
PEDS	32
PEDS	33
PEDS	34																															1	1			Poor percpetion of health issues
PEDS	35																																				1	1			Delayed care
PEDS	36
PEDS	37
PEDS	38
PEDS	39																1	1			Delay in obtaining appropriate formula
PEDS	40
PEDS	41																															1	1			Delay in seeking medical advice
PEDS	42
PEDS	43
PEDS	44	1				Poor communication between caregiver and pt
PEDS	45
PEDS	46																																				1	1			Missing appointments
PEDS	47																																									1	1			Delay in seeking medical attention
PEDS	48																																														1	1
PEDS	49
PEDS	50																																				1	1			Missing appointments
PEDS	51																										1	1			Using cheaper but unhealthy food
PEDS	52																																				1	1			Missing appointments
DENTAL	53	1															1																				1				Father only able to bring child during night clinic
DENTAL	54						1					1				Dental tx depends on pt's ability to work
DENTAL	55																																				1				Pt has no transportation - dependent on daughter to schedule dental tx
DENTAL	56																1															1	1			Smoter-Dry socket caused by inablity to refrain from smoking
DENTAL	57																1
DENTAL	58																1																				1				Patient with O2 tank dependent on family for rides
DENTAL	59																					1	1			Unable to pay for tx
DENTAL	60	1	1														1	1			Inability to pay for tx
DENTAL	61																															1				Understanding tx sequence
DENTAL	62																															1	1			Understand benefits of tx
DENTAL	63	1				Understanding tx sequence
DENTAL	64
DENTAL	65																															1					1				Minor; dependent on mother for transportation
DENTAL	66	1				Ability to comm. w/provider						1										1										1
DENTAL	67	1				Parent spanish-speaking only. Inability to comm. w/patient's father						1
DENTAL	68																																				1				Dependent on her daughter for transportation
DENTAL	69
DENTAL	70
DENTAL	71																1	1			not able to afford health care until FHCN visit
DENTAL	72	1	1
DENTAL	73	1	1
DENTAL	74																1	1			cannot afford best tx plan
DENTAL	75																1
DENTAL	76																1				poor oral health
DENTAL	77																1
DENTAL	78																															1	1			poor overal health
DENTAL	79																																				1	1			poor oral health
DENTAL	80																																									1	1			poor
DENTAL	81																1	1			not afford best treatment
DENTAL	82																															1	1			increased caries risk
DENTAL	83																1	1			poor food options parent can afford
DENTAL	84	1					1					1										1	1									1
DENTAL	85	1																														1	1			several missing teeth, decreased oral health
DENTAL	86																															1	1														1	1
DENTAL	87
DENTAL	88																1				can't afford treatment											1			1
DENTAL	89																1				cannot afford tx																1	1
DENTAL	90
DENTAL	91																																									1
DENTAL	92	1	1
DENTAL	93
DENTAL	94																1	1			chronic diseases																1	1									1
DENTAL	95
DENTAL	96	1	1
DENTAL	97																															1				poor health
DENTAL	98
DENTAL	99	1	1				1																									1					1	1
DENTAL	100	1	1									1					1
DENTAL	101																1															1				High BMI, uncontrolled HTN	1				pt. walks to clinic
DENTAL	102											1	1
DENTAL	103																															1	1			pt. moving 4 hours away from family, decreased emotional health
DENTAL	104
DENTAL	105																1															1					1	1			limit to WL facilities
DENTAL	106	1	1																																		1	1			limit to WL facilities
DENTAL	107	1	1			difficult to understand pt																																				1	1			limit use of care
DENTAL	108																1	1			not afford best tx											1
DENTAL	109																1	1			not afford medication
DENTAL	110																																				1	1			limit appt times
DENTAL	111
DENTAL	112	1				mother of child only signlanguage
DENTAL	113	1															1																				1
DENTAL	114																1		1		inability to eat, edentulism
DENTAL	115	1		1	1												1
DENTAL	116																					1				inability to pay for tx
DENTAL	117																1	1														1	1
DENTAL	118																1															1	1			poor oral hygiene, severe caries
DENTAL	119	1										1
DENTAL	120																1															1	1
DENTAL	121																1															1				inability to understand dental insurance policies
DENTAL	122																1				inability to pay for tx
DENTAL	123	1	1
DENTAL	124											1				family require tx asap due to travel to different state for work	1
DENTAL	125	1	1																													1	1			OHI given
FAMILY	126
FAMILY	127																																									1				will not take meds bc they sit on shelves too long and are rancid
FAMILY	128																																									1				Jehovahs Witness, no meds, will only do homeopathy
FAMILY	129																																									1				refuses meds, anxiety
FAMILY	130																1				patient visually dirty, comes in with injuries due to not being watched											1				mother
FAMILY	131
FAMILY	132																					1				states not getting food stamps and cant afford healthy food, no good food choices	1				pt. DM, high blood sugar	1					1				unable to get to specialists
FAMILY	133
FAMILY	134																																									1
FAMILY	135																1															1
FAMILY	136																																									1
FAMILY	137																															1	1			anxiety						1	1			limited ability to treat HTN
FAMILY	138	1	1			difficult to access healthcare resources
FAMILY	139																															1	1			can't understand medical condition or TXs
FAMILY	140																1	1			no insurance for 4 years, did not take meds for cholestoral or CAD, worsened						1	1
FAMILY	141																1	1			morbid obesity, sleep apnea, gains weight at each visit
FAMILY	142																															1	1			STD symptoms
FAMILY	143	1	1			doesn’t understand medical hx
FAMILY	144	1	1																								1	1				1	1			difficulty understanding instructions to take meds, diet changes						1	1			sticks to Latin foods, won't change diet
FAMILY	145	1	1														1	1			can't afford to treat wound																1	1			can't get to specialist to treat wound
FAMILY	146
FAMILY	147	1	1																																							1	1			believes certain cause of symptoms despite negative labs
FAMILY	148	1	1			difficult to understand instructions																										1	1									1	1
FAMILY	149
FAMILY	150	1	1																																							1	1			use of home remedies
FAMILY	151	1	1				1	1			chest pain, costochondritis, anxiety, frequent appts																					1	1									1	1
FAMILY	152
FAMILY	153	1	1			can't convey concerns
FAMILY	154	1	1																			1	1			refuse screening exams
FAMILY	155	1	1																													1	1			confused about meds
FAMILY	156																1	1			food choices											1				limited understanding	1	1			difficulty making appts
FAMILY	157																1	1			hesitant to schedule appts, difficulty making co-pay
FAMILY	158
FAMILY	159																															1				delay of care
FAMILY	160						1				no insurance																					1	1			decreased compliance	1				difficulty coming to appts
FAMILY	161	1																														1				non-compliant, can't understand importance of meds
FAMILY	162																															1	1			non-compliance
FAMILY	163	1	1																													1				delay of care	1				relies on daughter
FAMILY	164																															1	1		1	poor health decisions											1
FAMILY	165																										1				chronic D2 uncontrolled						1				diffculty getting to appts
FAMILY	166																					1					1	1			pre-diabetes, HTN
FAMILY	167																																				1				missed appointments
FAMILY	168																1				diet, meds						1	1			diet						1	1			difficulty making appts
FAMILY	169	1					1															1	1			cant afford meds						1				understanding health condition
FAMILY	170	1																																			1				difficulty making appts
FAMILY	171																					1	1		1	HTN, poor controlled BP, obesity, risk of impaired glucose tolerance						1	1	1
FAMILY	172																1	1			poor nutrition
FAMILY	173
FAMILY	174																					1				diet	1			1	obesity						1	1			diffculty keeping appts
FAMILY	175	1				limited understand of DX	1	1			limited access to specialist											1				limited access/money						1	1		1	limited understand of DX	1	1			limited access
FAMILY	176																1				limited money/access						1	1		1	limited nutrition	1				limited understand of DX	1	1			limited access
FAMILY	177	1				limited understand of DX																1				limited access/money						1				limited understand of DX
FAMILY	178	1				limited understand of DX																					1	1		1	limited nutrition
FAMILY	179	1				limited understand of DX																1				limited access/money	1	1		1	limited access/money	1	1			limited understanding of DX											1	1
FAMILY	180																1				limited money/access						1	1		1	limited money/access	1					1	1			limited access
FAMILY	181	1				limited understanding of DX						1				limited access to treatment	1			1	money limitations for specialists											1				limited understanding of DX	1	1			limited access
FAMILY	182	1				limited knowledge/understanding	1				limited access to resources						1			1	limited money/access/nutrition/health											1	1			limited understanding of DX	1
FAMILY	183																1	1		1	limited money, access to nutrition											1	1			limited understanding of DX						1
FAMILY	184																					1				limited money/resources	1	1		1	poor health, obesity	1	1		1	limited knowledge/access
FAMILY	185	1				limited knowledge/understanding											1				limited money/access						1	1		1	obesity, HTN, DM	1	1			limited knowledge/understanding
FAMILY	186																					1				limited money/resources	1	1		1	limited access to nutition/resources
FAMILY	187	1				limited understanding of DX																															1	1			limited access to care
FAMILY	188																															1	1			limited understanding of DX
FAMILY	189	1				limited comprehension	1					1				limited access to care	1				limited money/access																1	1			limited access
FAMILY	190	1				limited comprehension/communication																1				limited access/money						1				limited understanding of DX
FAMILY	191	1				limited understanding of plan/DX											1				limited money/access						1	1		1	limited money/access	1				limited understanding of DX
FAMILY	192	1				limited communication	1				limited access to care																					1				limited understanding of DX											1
FAMILY	193																1				limited money/access						1	1		1	limited money/access	1				limited understanding of DX
FAMILY	194	1				limited understanding/impaired communication																1				limited money/access	1	1		1	limited money/access to nutrition, balanced diet
FAMILY	195	1				limited knowledge/understanding of care	1				limited access to care						1				limited money/access											1				limited communication	1	1			limited access	1
FAMILY	196											1				limited access						1				money concerns/limited access
FAMILY	197	1				limited understanding of DX																										1				limited understanding of DX
FAMILY	198						1				limited access to care	1				limited access	1				limited money/access																1	1			limited access
FAMILY	199																1				limited access to care						1	1		1	limited access to nutrition
FAMILY	200	1				limited knowledge of DX											1				limited access to care						1	1		1	limited access to nutrition
FAMILY	201	1				limited understanding of care plan																1				money limitations	1	1		1	limited access to nutrition	1				limited nutrition understanding
FAMILY	202	1				limited understanding of care plan																1				limited access						1				limited understanding of care plan
FAMILY	203																1				limited access to care						1	1		1	limited nutrition	1				limited understanding	1				limited access
FAMILY	204	1				limited awareness of DX											1				limited access to care											1				limited understanding
FAMILY	205	1				limited understanding of DX	1				limited access						1				limited money						1	1		1	limited nutrition	1				limited understanding	1	1			limited access
FAMILY	206	1				limited understanding of care plan											1				limited access to care											1				limited understanding	1	1			limited access
FAMILY	207	1				limited understanding	1				limited access	1				limited access	1				limited money/access						1	1		1	limited access to nutrition	1					1	1			limited access						1	1
FAMILY	208	1				limited understanding																										1				limited understanding
FAMILY	209																					1				limited access	1	1		1	limited access to nutrition	1				limited understanding	1	1			limited access	1				barriers to health	1	1
FAMILY	210	1				limited understanding of DX											1				limited access											1				limited knowledge/access
FAMILY	211	1				limited understanding of DX	1				limited access	1				limited access						1				limited access	1	1		1	limited nutrition	1				limited understanding of care plan
FAMILY	212	1				limited understanding of DX	1				limited access	1				limited access	1				limited access						1	1		1	limited nutrition	1				limited understanding of care plan	1	1			limited access	1				barriers to care	1
FAMILY	213	1				difficulty communicating																1				unable to afford meds, services	1	1		1	affects nutrition status	1				limited understanding
FAMILY	214	1				difficulty communicating																					1	1		1	affects nutrition status, chronic D2	1				limited understanding
FAMILY	215	1	1			difficulty communicating	1				no health insurance											1	1			difficulty paying for meds						1				limited understanding
FAMILY	216	1				difficulty communicating	1	1			no health insurance						1	1			unable to afford meds, delay of care											1				limited understanding, delay of care
FAMILY	217																					1				limited access	1	1		1	limited access
FAMILY	218
FAMILY	219																					1				limited access											1	1			limited access						1	1
FAMILY	220																					1				limited access	1	1		1	limited access to nutrition
FAMILY	221
FAMILY	222																1				limited access																1	1			limited access
FAMILY	223	1				limited understanding											1				limited access						1	1		1	limited access to nutrition	1				limited understanding of tx	1	1			limited access
FAMILY	224	1																				1				limited access	1	1	1	1	limited access to nutrition	1				limited understanding of tx
FAMILY	225	1				limited understanding	1				limited access	1				limited access	1				limited access																1	1			limited access
FAMILY	226	1				limited understanding																1				limited access
FAMILY	227																					1	1			delayed care	1	1			nutrition/overall health affected						1	1			delayed care
FAMILY	228	1	1			difficulty communicating																					1	1		1	poor diet	1				limited understanding/compliance	1				difficulty making appts
FAMILY	229																					1	1			affects access	1	1		1	affects overall health						1				difficulty making appts
FAMILY	230	1	1			difficulty communicating											1	1			limited access											1	1			confused about meds
FAMILY	231	1	1			difficulty communicating																										1	1			limited understanding of D2	1	1			missed specialist appts
FAMILY	232																					1				delayed care - inability to purchase necessary orthotics
FAMILY	233																1	1			no insurance - off meds for 4 years, hx bypass surgery, ER for active chest pain, needs cholesterol meds
FAMILY	234																										1	1			can't change diet
FAMILY	235	1	1			poor understanding of condition - non-compliant with labs/appts																					1	1				1	1			poor understanding of labs and need for meds
FAMILY	236
FAMILY	237	1	1			in past, difficult time communicating with other providers																										1	1			difficult to understand med/appt compliance
FAMILY	238	1	1				1	1									1	1									1	1				1	1			poor DM control						1	1
FAMILY	239																					1															1				trouble with referrals to specialists
FAMILY	240
FAMILY	241																										1				can't afford healthy food																1
FAMILY	242																1										1				DM issues, get meals on wheels - not good						1				issues getting to appts
FAMILY	243																															1	1			difficulty understanding plan despite repitition
FAMILY	244																																									1				use of supplements and oils have caused health issues
FAMILY	245
FAMILY	246																1															1				frequent unneeded visits
FAMILY	247																															1	1			anxiety over what pt does not understand
FAMILY	248																					1				no flu due to copay
FAMILY	249																					1	1			does not want to come in for regular flu
FAMILY	250																																									1				refuses treatments (antibiotics, IZs)
FAMILY	251
FAMILY	252																																									1	1			No IZ's
FAMILY	253	1				difficult to understand plan
FAMILY	254																																									1	1			No IZ's
FAMILY	255																																									1				refuses meds, using herbs
FAMILY	256																					1				anxiety over money	1				anxiety over food
FAMILY	257																										1				poor food choices
FAMILY	258																																									1	1			No IZ's, refuses meds
FAMILY	259	1
FAMILY	260																																									1				anxiety
FAMILY	261																										1				DM, TV dinners only, no one to cook for him						1
FAMILY	262																1				trouble with foods											1										1				use of strange supplements and treatments
FAMILY	263																																									1				no screening tests
FAMILY	264																1										1															1
FAMILY	265																					1				worry about paying for meds											1				worries about being a burden on family
FAMILY	266																																				1				trouble getting to flu appts
FAMILY	267
[truncated: 23 more columns]

## Sheet: CA
SDH	Total Count		Billed	Diagnosed	% Billed	% Diagnosed	% Billed/Diagnosis
Language	84		1	1	0.0119	0.0119	1
Immigrant	20		0	0
Migrant	16		0	0
Poverty	75		1	3	0.013	0.04	0.3333
Near Poverty	42		0	1	0	0.0238	0
Food Insecure	46		1	28	0.0217	0.6087	0.0357
Education	90		1	4	0.0111	0.0444	0.25
Transportation	64		0	0
Culture	30		0	0
Neighborhood	14		0	0
Unstable Work	57		1	0	0.0175	0	n/a
Family	57		3	29	0.0526	0.509	0.1034
Other	34		2	2	0.0588	0.0588	1
TOTAL	629		10	68	0.0159	0.1081	0.1471
Specialty	SDHs	Encounters	Avg/Encounter	Most Reported
Family Medicine	419	142	2.95	education
Pediatric Medicine	59	52	1.14	transportation
Dentistry	151	73	2.07	poverty
TOTAL	629	267	2.36	education
Appt Time	SDHs	# Appts	Avg/Appt	Most Reported
7am-12pm	244	111	2.19	education
12pm-5pm	197	89	2.21	poverty
5pm-9pm	72	26	2.77	education
Saturday	81	17	4.76	education
Not Marked	35	24	1.46	other
TOTAL	629	267	2.36	education
SDH	Perceived Effect on Health
Language	limited understanding of diagnosis, treatment
Immigrant	limited access to resources
Migrant	limited access to resources
Poverty	can't afford care, limited access to best care
Near Poverty	can't afford care, limited access to best care, obesity
Food Insecure	poor nutrition, obesity, diabetes
Education	poor understanding, non-compliant, poor oral health
Transportation	delay in care, limited access
Culture	refusal of treatment, no Izs, home care side effects
Neighborhood	limited outdoor activity, stress
Unstable Work	limited access, missing appointments
Family	anxiety/stress
Other	overall decreased health (physical, mental, oral)

## Sheet: New York - Raw
Site	COUNT	CARD #	OBGYN	Saturday	Child Visit	EDUCATION	ED Intervention	ED Billable	ED Diagnosis	ED Effects	LANGUAGE	LG Intervention	LG Billable	LG Diagnosis	LG Effects	POVERTY	PY Intervention	PY Billable	PY Diagnosis	PY Effects	NEAR POVERTY	NP Intervention	NP Billable	NP Diagnosis	NP Effects	INSURANCE	IN Intervention	IN Billable	IN Diagnosis	IN Effects	FOOD INSECURE	FI Intervention	FI Billable	FI Diagnosis	FI Effects	HOMELESS	HL Intervention	HL Billable	HL Diagnosis	HL Effects	UNSTABLE HOUSING	UH Intervention	UH Billable	UH Diagnosis	UH Effects	UNSTABLE WORK	UW Intervention	UW Billable	UW Diagnosis
CA	1	G1		1																																										1
CA	2	G2		1	1	1	1
CA	3	G3		1
CA	4	G4		1												1
CA	5	G5		1
CA	6	G6		1
CA	7	G7		1
CA	8	G8		1		1					1					1																									1
CA	9	G9		1	1																1
CA	10	G10		1												1										1
CA	11	G11		1												1															1
CA	12	G12		1																	1
CA	13	G13		1																	1
CA	14	G14
CA	15	G15		1																	1										1	1	1	1							1
CA	16	G16																			1					1	1
CA	17	G17																																												1
CA	18	G18																																												1
CA	19	G19
CA	20	G20
CA	21	G21
CA	22	G22																													1
CA	23	G23																																												1
CA	24	G24																			1
CA	25	G25														1																									1
CA	26	G26
CA	27	G27				1
CA	28	G28																																							1
CA	29	G29																								1
CA	30	G30																																												1
CA	31	G31																																							1
CA	32	G32
CA	33	G33									1
CA	34	G34
CA	35	G35																													1
CA	36	G36			1						1
CA	37	G37			1						1
CA	38	G38																																							1
CA	39	G39
CA	40	G40																								1
CA	41	G41																																												1
CA	42	G42
CA	43	G43
CA	44	G44																								1				Delay on mammogram
CA	45	G45																																												1
CA	46	G46			1																					1			1												1			1
CA	47	G47																								1
CA	48	G48																																												1
CA	49	G49
CA	50	G50
CA	51	G51				1
CA	52	G52																								1
CA	53	G53																								1			1
CA	54	G54				1					1
CA	55	G55
CA	56	G111																																												1
CA	57	G112									1	1
CA	58	G113
CA	59	G114																																							1	1			affects drug use, HIV care
CA	60	G115									1
CA	61	G116
CA	62	G117									1
CA	63	G118
CA	64	G119		1																	1
CA	65	G120																																												1
CA	66	G121																																		1					1
CA	67	G122																								1
CA	68	G123
CA	69	G124																			1					1
CA	70	G125
CA	71	G126			1
CA	72	G127
CA	73	G128																																												1
CA	74	G129																																												1
CA	75	G130
CA	76	G131																																												1
CA	77	G132
CA	78	G147																								1				waited for days to come to clinic for acute problem
CA	79	G148																								1
CA	80	G149																																												1			1
CA	81	G150				1				ability to understand condition
CA	82	G151									1
CA	83	G152																								1				unable to get to clinic HIV labs done
CA	84	G153			1
CA	85	G154			1
CA	86	G155
CA	87	G156			1
CA	88	G157
CA	89	G158
CA	90	G159
CA	91	G160
CAD	1	G56				1																				1										1
CAD	2	G57				1
CAD	3	G58									1																														1
CAD	4	G59				1
CAD	5	G60									1																									1
CAD	6	G61				1
CAD	7	G62																													1
CAD	8	G63														1																									1
CAD	9	G64														1										1																				1
CAD	10	G65									1
CAD	11	G66																								1
CAD	12	G67																																		1
CAD	13	G68																			1
CAD	14	G69																																												1
CAD	15	G70																																												1
CAD	16	G71
CAD	17	G72																																												1
CAD	18	G73
CAD	19	G74																																												1
CAD	20	G75																								1					1
CAD	21	G76				1					1					1
CAD	22	G77									1
CAD	23	G78				1																																								1
CAD	24	G79																								1																				1
CAD	25	G80				1					1					1
CAD	26	G81				1																														1
CAD	27	G82																			1										1
CAD	28	G83				1					1
CAD	29	G84				1																																			1
CAD	30	G85				1
CAD	31	G86									1																														1
CAD	32	G87				1					1															1
CAD	33	G88																			1																									1
CAD	34	G89									1					1										1										1
CAD	35	G90									1															1															1
CAD	36	G91				1					1															1
CAD	37	G92														1										1
CAD	38	G93														1																				1
CAD	39	G94				1	1				1	1				1										1										1
CAD	40	G95				1																				1
CAD	41	G96									1
CAD	42	G97																																							1
CAD	43	G98
CAD	44	G99																																												1
CAD	45	G100																																												1
CAD	46	G101																								1																				1
CAD	47	G102																								1																				1
CAD	48	G103																																												1
CAD	49	G104																																												1
CAD	50	G105									1																																			1
CAD	51	G106
CAD	52	G107														1										1										1
CAD	53	G108				1																																			1					1
CAD	54	G109																								1
CAD	55	G110				1
CAD	56	G133				1					1
CAD	57	G134				1
CAD	58	G135																																		1
CAD	59	G136																																		1
CAD	60	G137									1
CAD	61	G138																			1
CAD	62	G139
CAD	63	G140																																		1
CAD	64	G141
CAD	65	G142				1
CAD	66	G143				1																				1
CAD	67	G144																								1
CAD	68	G145																								1															1
CAD	69	G146																								1															1					1
FP	1	A1			1						1
FP	2	A2				1	1
FP	3	A3																																												1	1
FP	4	A4				1	1
FP	5	A5				1				Decreased compliance																1
FP	6	A6																																												1	1
FP	7	A7			1	1	1			Recurrent gastritis																					1	1			Recurrent Sx
FP	8	A8
FP	9	A9
FP	10	A10				1				"check mark"	1				"check mark"
FP	11	A11																																												1
FP	12	A12
FP	13	A13									1
FP	14	A14				1				"check mark"
FP	15	A15									1
FP	16	A16				1	1
FP	17	A17									1	1	1	1
FP	18	A18
FP	19	A19				1	1																			1																				1
FP	20	A20				1	1				1	1									1					1				Insurance ran out
FP	21	A21				1	1														1
FP	22	A22				1	1				1	1														1
FP	23	A23
FP	24	A24				1	1
FP	25	A25				1	1
FP	26	A26				1	1
FP	27	A27				1	1				1	1
FP	28	A28			1
FP	29	A29									1	1														1	1			cannot pay for PT
FP	30	A30				1	1														1
FP	31	A31				1	1
FP	32	A32
FP	33	A33				1	1				1
FP	34	A34				1	1														1
FP	35	A35				1	1
FP	36	A36				1	1
FP	37	A37				1	1
FP	38	A38				1	1
FP	39	A39				1	1																																							1
FP	40	A40				1	1				1	1			translation
FP	41	A41				1	1														1
FP	42	A42				1	1
FP	43	A43
FP	44	A44				1	1			worsening of health
FP	45	A45				1	1				1	1
FP	46	A46
FP	47	A47
FP	48	A48				1	1
FP	49	A49				1	1				1	1			Used translation but does not always seem to understand
FP	50	A50				1	1
FP	51	A51				1	1														1	1				1	1
FP	52	A52			1
FP	53	A53				1				"check mark"
FP	54	A54				1	1
FP	55	A55																																							1	1			increased stress/depression
FP	56	A56				1	1			decreased compliance
FP	57	A57				1	1
FP	58	A58				1	1														1	1
FP	59	A59				1	1
FP	60	A60
FP	61	A61				1					1
FP	62	A62									1
FP	63	A63									1
FP	64	A64				1	1				1
FP	65	A65																								1	1	1	1	Not able to do procedure electively
FP	66	A66									1		1	1												1		1	1	Medication compliance due to cost
FP	67	A67
FP	68	A68				1				"check mark"											1				"check mark"
FP	69	A69
FP	70	A70
FP	71	A71
FP	72	A72
FP	73	A73
FP	74	A74
FP	75	z1				1	1														1	1				1
FP	76	z2									1	1														1
FP	77	z3				1	1																			1	1																			1
FP	78	z4				1	1				1	1
FP	79	z5				1	1
FP	80	z6				1	1				1	1														1	1
FP	81	z7									1															1				noncompliance
FP	82	z8				1	1	1	1																																1	1	1	1
FP	83	z9
FP	84	z10
FP	85	z11
FP	86	z12									1
FP	87	z13									1
FP	88	z14				1										1
FP	89	z15				1
FP	90	z16									1
FP	91	z17									1																														1
FP	92	z18									1
FP	93	z19				1
FP	94	z20
FP	95	z21
FP	96	z22
FP	97	z23
FP	98	z24
FP	99	z25
FP	100	z26				1
FP	101	z27				1
FP	102	z28
FP	103	z29				1					1
FP	104	z30				1
FP	105	z31
FP	106	z32				1
FP	107	z33				1
FP	108	z34
FP	109	z35				1					1
FP	110	z36				1
FP	111	z37
FP	112	z38
FP	113	z39
FP	114	z40																																							1
FP	115	z41
FP	116	z42																																							1
FP	117	z43				1
FP	118	z44									1
FP	119	z45				1
FP	120	z46									1
FP	121	z47
FP	122	z48
FP	123	z49
FP	124	z50
FP	125	z51				1	1			repeat visits for same complaint
FP	126	z52				1	1			misconceptions about diagnosis
FP	127	z53																								1	1
FP	128	z54				1					1	1				1	1
FP	129	z55									1
FP	130	z56
FP	131	z57				1																				1
FP	132	z58									1															1
FP	133	z59
FP	134	z60
FP	135	z61									1
FP	136	z62
FP	137	z63									1
											14
[truncated: 34 more columns]

## Sheet: NY
Site 1
Factors	Encounters	Avg Factors/Encounter			Factor	Count		Billed	Diagnosed	% Billed	% Diagnosed	% Billed/Diagnosis		Intervention	%		Effects	%
221	137	1.61			Education Limitations	65		1	1	1.54	1.54	100		44	67.69		10	15.38
					Family Care Demands	38		0	0	0	0			10	26.32		11	28.95
					Language Barrier	36		2	2	5.56	5.56	100		10	27.78		4	11.11
No Factors	Encounters	% Encounters with no Factors			Other	19		0	0	0	0			5	26.32		13	68.42
11	137	8.03			Lacking Insurance	16		0	0	0	0			2	12.5		1	6.25
Yes Factors	Encounters	% Encounters with Factors			Culture Barriers	12		2	2	16.67	16.67	100		5	41.67		4	33.33
126	137	91.97			Transportation Issues	11		0	0	0	0			4	36.36		9	81.82
					Near Poverty	9		1	1	11.11	11.11	100		3	33.33		3	33.33
					Unstable Work	6		0	0	0	0			3	50		2	33.33
Visit Type	Encounters	# Factors	Avg Factors/Encounter		Unstable Housing	5		0	0	0	0			2	40		1	20
OBGYN	0	0			Poverty	2		0	0	0	0			1	50		2	100
Saturday	0	0			Immigrant	1		0	0	0	0			0	0		0	0
Child	4	3	0.75		Food Insecure	1		0	0	0	0			0	0		0	0
All Other	133	218	1.64		Neighborhood	0		0	0	0	0			0			0
					Migrant	0		0	0	0	0			0			0
					Homeless	0		0	0	0	0			0			0
					TOTAL	221		6	6	2.72	2.72	100		89	51.94		60	37.98
Site 2
Factors	Encounters	Avg Factors/Encounter			SDH	Total Count		Billed	Diagnosed	% Billed	% Diagnosed	% Billed/Diagnosis		Intervention	%		Effects	%
319	97	3.3			Homeless	54		0	13	0	0.2407	0		2	3.73		21	38.8
					Poverty	38		0	1	0	0.0263	0		0	0		16	42.1
					Education	35		0	0	0	0	0		11	3.14		20	57.1
No Factors	Encounters	% Encounters with no Factors			Unstable Work	31		0	0	0	0	0		1	3.22		4	12.9
3	97	3.1			Near Poverty	27		0	0	0	0	0		1	3.71		10	37.03
Yes Factors	Encounters	% Encounters with Factors			Unstable House	25		0	3	0	0.12	0		1	4		6	24
94	97	96.9			Transportation	22		0	0	0	0	0		6	27.27		9	40.9
					Insurance	16		0	0	0	0	0		3	18.75		10	62.5
					Immigrant	15		0	0	0	0	0		2	13.3		1	6.67
Visit Type	Number	Factors	Avg Factors/Encounter		Food Insecure	11		0	0	0	0	0		1	9.09		0	0
Child	1	0	0		Family Care	11		0	0	0	0	0		5	45.45		1	9.09
OBGYN	1	6	6		Language	10		0	0	0	0	0		2	20		2	20
Saturday	0	~	~		Other	9		0	0	0	0	0		1	11.11		8	88.8
All Other	95	313	3.29		Neighborhood	8		0	0	0	0	0		3	37.5		1	12.5
					Culture	7		0	0	0	0	0		3	42.85		0	0
					Migrant	0
					TOTAL	319		0	17	0	0.0533	0		42	13.16		109	34.17
Site 3
Factors	Encounters	Avg Factors/Encounter			Factor	Count		Billed	Diagnosed	% Billed	% Diagnosed	% Billed/Diagnosis		Intervention	%		Effects	%
273	160	1.71			Insurance	34		0	2	0	5.88	0		1	2.94		3	8.82
					Unstable Work	31		0	1	0	3.23	0		0	0		4	12.9
					Family Care	29		2	3	6.9	10.35	66.67		8	27.59		4	13.79
No Factors	Encounters	% Encounters with no Factors			Education	27		0	0	0	0	~		2	7.41		1	3.7
9	160	5.63			Language	26		0	0	0	0	~		2	7.69		0	0
Yes Factors	Encounters	% Encounters with Factors			Immigrant	25		0	1	0	4	0		2	8		3	12
151	160	94.37			Unstable House	18		0	1	0	5.56	0		1	5.56		1	5.56
					Transportation	17		0	0	0	0	~		0	0		2	11.76
					Poverty	14		0	0	0	0	~		0	0		0	0
Visit Type	Count	Factors	Avg Factors/Encounter		Homeless	12		0	0	0	0	~		0	0		0	0
OBGYN	0	~			Near Poverty	12		0	0	0	0	~		0	0		0	0
Saturday	15	30	2		Neighborhood	8		0	0	0	0	~		0	0		0	0
Child	9	10	1.11		Food Insecure	7		1	1	14.29	14.29	100		1	14.29		0	0
Dental	69	148	2.15		Culture	6		0	0	0	0	~		1	16.67		0	0
Medical	91	125	1.37		Other	5		0	0	0	0	~		0	0		0	0
					Migrant	2		0	0	0	0	~		0	0		0	0
					TOTAL	273		3	9	1.1	3.3	33.33		18	6.59		18	6.59
ALL CLINICS
Factors	Encounters	Avg Factors/Encounter			Factor	Count		Billed	Diagnosed	% Billed	% Diagnosed	% Billed/Diagnosis		Intervention	%		Effects	%
813	394	2.06			Education Limitations	127		1	1	0.79	0.79	100		57	44.88		31	24.41
					Family Care Demands	78		2	3	2.56	3.85	66.67		23	29.49		16	20.51
					Language Barrier	72		2	2	2.78	2.78	100		14	19.44		6	8.33
No Factors	Encounters	% Encounters with no Factors			Unstable Work	68		0	1	0	1.47	0		4	5.88		10	14.71
23	394	5.84			Homeless	66		0	13	0	19.7	0		2	3.03		21	31.82
Yes Factors	Encounters	% Encounters with Factors			Lacking Insurance	66		0	2	0	3.03	0		6	9.09		14	21.21
371	394	94.16			Poverty	54		0	1	0	1.85	0		1	1.85		18	33.33
					Transportation Issues	50		0	0	0	0			10	20		20	40
					Near Poverty	48		1	1	2.08	2.08	100		4	8.33		13	27.08
Visit Type	Count	Factors	Avg Factors/Encounter		Unstable Housing	48		0	4	0	8.33	0		4	8.33		8	16.67
OBGYN	1	6	6		Immigrant	41		0	1	0	2.44	0		4	9.76		4	9.76
Saturday	15	30	2		Other	33		0	0	0	0			6	18.18		21	63.64
Child	14	13	0.99		Culture Barriers	25		2	2	8	8	100		9	36		0	0
All Other	364	764	2.1		Food Insecure	19		1	1	5.26	5.26	100		2	10.53		4	21.05
					Neighborhood	16		0	0	0	0			3	18.75		1	6.25
					Migrant	2		0	0	0	0			0	0		0	0
					TOTAL	813		9	32	1.11	3.94	28.13		149	18.33		187	23

## Sheet: Illinois - Raw
Site	CARD #	OBGYN	Saturday	Child Visit	EDUCATION	ED Intervention	ED Billable	ED Diagnosis	ED Effects	LANGUAGE	LG Intervention	LG Billable	LG Diagnosis	LG Effects	POVERTY	PY Intervention	PY Billable	PY Diagnosis	PY Effects	NEAR POVERTY	NP Intervention	NP Billable	NP Diagnosis	NP Effects	INSURANCE	IN Intervention	IN Billable	IN Diagnosis	IN Effects	FOOD INSECURE	FI Intervention	FI Billable	FI Diagnosis	FI Effects	HOMELESS	HL Intervention	HL Billable	HL Diagnosis	HL Effects	UNSTABLE HOUSING	UH Intervention	UH Billable	UH Diagnosis	UH Effects	UNSTABLE WORK	UW Intervention	UW Billable	UW Diagnosis	UW Effects
NW	1									1	1			DM
NW	2
NW	3				1	1			DM
NW	4				1	1			Use of Meds
NW	5
NW	6									1	1			Ed in English
NW	7									1	1			Ed in English
NW	8									1	1			Ed in English
NW	9									1	1			Obesity
NW	10									1	1			Obesity, DM
NW	11									1	1			DM
NW	12									1	1			Refer Delay
NW	13																			1	1			Hygenine
NW	14																								1	1			No Meds
NW	15																													1	1			BP
NW	16
NW	17
NW	18																																							1	1			Multiple Dx
NW	19
NW	20									1	1			Hypothyroid
NW	21																																												1	1			Inflexible
NW	22									1	1			Ed in English
NW	23				1	1			Fq infections, smoker
NW	24									1	1			Ed in English
NW	25									1	1			Obesity
NW	26									1				DM
NW	27				1	1			DM
NW	28																								1	1			No insulin
NW	29									1				Can't explain self											1				no continuity
NW	30																								1	1			no meds
NW	31	1													1	1																								1	1
NW	32				1					1					1				insufficient meds						1																				1
NW	33	1			1					1
NW	34		1	1	1				incomplete exam
NW	35	1								1															1				delayed care
NW	36				1				elevated BP																																				1
C	37
C	38																								1				delayed care
C	39	1													1			1							1	1		1	no dr. in 4 yrs	1	1
C	40																								1				no meds
C	41																								1				no meds
C	42														1										1				needs referral
C	43																								1				limited options
C	44																								1																				1
C	45			1											1										1				no subspecialty appts											1
C	46			1						1	1
C	47			1
C	48			1																																				1				missed appts, vaccines
C	49			1						1	1
C	50			1						1	1
C	51			1											1																									1				no proper tx
C	52			1											1																				1	1			missed appts
C	53			1											1																				1				missed appts
C	54			1
C	55			1	1	1			not in school						1
C	56			1
C	57			1
C	58			1																					1	1			no subspecialists											1
C	59			1
C	60			1	1	1			cant follow dx for formula
S	61																			1				loss of teeth
S	62				1				missing teeth											1				cant replace teeth
S	63				1				few teeth											1				poor hygeine
S	64																								1				cant save teeth
S	65														1				missing teeth, poor diet
S	66				1				poor diet
S	67				1	1			fail to understand health issues						1				cant replace missing teeth	1				missing teeth																					1	1			cant afford new teeth
S	68																			1					1	1			cant pay for SRP
S	69																			1					1	1			cant pay for SRP
S	70				1				need root canal/extraction
S	71			1
S	72				1	1			poor oral health						1				cant save teeth																					1
S	73				1				poor oral health
S	74			1
S	75																			1	1			poor oral health
S	76
S	77
S	78
S	79
S	80
S	81																								1	1			afford visits
S	82
S	83																								1	1			afford meds
S	84																																												1	1			lim. Avail.
S	85
S	86																			1			1	non-adherence																					1			1	HTN
[truncated: 33 more columns]

## Sheet: IL
Region 1
Factors	Encounters	Avg Factors/Encounter			Factor	Count		Billed	Diagnosed	% Billed	% Diagnosed	% Billed/Diagnosis		Intervention	%		Effects	%
59	36	1.64			Language Barrier	17		0	0	0	0	~		12	70.6		14	82.4
					Neighborhood Safety	9		0	0	0	0	~		8	88.9		8	88.9
					Educational Limitations	8		0	0	0	0	~		4	50		6	75
No Factors	Encounters	% Encounters with no Factors			Lack of Insurance	6		0	0	0	0	~		3	50		5	83.3
0	36	0			Unstable Work Schedule	3		0	0	0	0	~		1	33.3		1	33.3
Yes Factors	Encounters	% Encounters with Factors			Transportation Issues	3		0	0	0	0	~		1	33.3		3	100
36	36	100			Cultural Barriers	3		0	0	0	0	~		0	0		2	66.7
					Immigrant Status	3		0	0	0	0	~		0	0		1	33.3
					Poverty	2		0	0	0	0	~		1	50		1	50
Visit Type	Encounters	# Factors	Avg Factors/Encounter		Unstable Housing	2		0	0	0	0	~		2	100		1	50
OBGYN	3	8	2.67		Near Poverty	1		0	0	0	0	~		1	100		1	100
Saturday	1	2	2		Food Insecurity	1		0	0	0	0	~		1	100		1	100
Child	1	2	2		Family Care Demands	1		0	0	0	0	~		1	100		0	0
All Other	31	49	1.58		Homelessness	0		0	0	0	0	~		~	~		~	~
					Migrant Status	0		0	0	0	0	~		~	~		~	~
					Other	0		0	0	0	0	~		~	~		~	~
					TOTAL	59		0	0	0	0	~		35	59.3		44	74.6
Region 2
Factors	Encounters	Avg Factors/Encounter			SDH	Total Count		Billed	Diagnosed	% Billed	% Diagnosed	% Billed/Diagnosis		Intervention	%		Effects	%
43	24	1.79			Lack of Insurance	9		0	1	0	0.111	0		2	22.2		8	88.9
					Poverty	7		0	1	0	0.143	0		0	0		0	0
					Family Care Demands	5		0	1	0	0.2	0		5	100		5	100
No Factors	Encounters	% Encounters with no Factors			Unstable Housing	4		0	0	0	0	0		0	0		2	50
0	24	0			Transportation Issues	4		0	0	0	0	0		1	25		2	50
Yes Factors	Encounters	% Encounters with Factors			Language Barriers	3		0	0	0	0	0		3	100		0	0
24	24	100			Educational Limitations	2		0	0	0	0	0		2	100		2	100
					Homelessness	2		0	0	0	0	0		1	50		2	100
					Neighborhood Safety	2		0	1	0	0.5	0		1	50		1	50
Visit Type	Number	Factors	Avg Factors/Encounter		Food Insecurity	1		0	0	0	0	0		1	100		0	0
Child	16	29	1.81		Unstable Work Schedule	1		0	0	0	0	0		0	0		0	0
OBGYN	1	5	5		Cultural Barriers	1		1	0	1	0	~		1	100		1	100
Saturday	0	~	~		Immigrant Status	1		0	0	0	0	0		1	100		1	100
All Other	7	9	1.29		Migrant Status	1		0	0	0	0	0		1	100		1	100
					Near Poverty	0		~	~	~	~	~		~	~		~	~
					Other	0		~	~	~	~	~		~	~		~	~
					TOTAL	43		1	4	2.33	0.093	25		19	44.2		25	58.1
Region 3
Factors	Encounters	Avg Factors/Encounter			Factor	Count		Billed	Diagnosed	% Billed	% Diagnosed	% Billed/Diagnosis		Intervention	%		Effects	%
40	26	1.54			Near Poverty	8		0	1	0	12.5	0		1	12.5		6	75
					Educational Limitations	7		0	0	0	0	0		2	28.6		7	100
					Neighborhood Safety	7		0	0	0	0	0		6	85.7		7	100
No Factors	Encounters	% Encounters with no Factors			Lack of Insurance	5		0	0	0	0	0		4	80		5	100
0	26	0			Poverty	3		0	0	0	0	0		0	0		3	100
Yes Factors	Encounters	% Encounters with Factors			Unstable Work Schedule	3		0	1	0	33.3	0		2	66.7		3	100
26	26	100			Family Care Demands	3		0	1	0	33.3	0		0	0		1	33.3
					Unstable Housing	1		0	0	0	0	0		0	0		0	0
					Transportation Issues	1		0	0	0	0	0		1	100		1	100
Visit Type	Count	Factors	Avg Factors/Encounter		Cultural Barriers	1		0	0	0	0	0		1	100		1	100
OBGYN	0	~	~		Immigrant Status	1		0	0	0	0	0		0	0		0	0
Saturday	0	~	~		Language Barriers	0		~	~	~	~	~		~	~		~	~
Child	2	2	1		Food Insecurity	0		~	~	~	~	~		~	~		~	~
					Homelessness	0		~	~	~	~	~		~	~		~	~
					Migrant Status	0		~	~	~	~	~		~	~		~	~
					Other	0		~	~	~	~	~		~	~		~	~
					TOTAL	40		0	3	0	7.5	0		17	42.5		34	85
ALL REGIONS
Factors	Encounters	Avg Factors/Encounter			Factor	Count		Billed	Diagnosed	% Billed	% Diagnosed	% Billed/Diagnosis		Intervention	%		Effects	%
142	86	1.65			Language Barriers	20		0	0	0	0	~		15			14
					Lack of Insurance	20		0	1	0	5	0		9			18
					Neighborhood Safety	18		0	2	0	11.1	0		15			6
No Factors	Encounters	% Encounters with no Factors			Educational Limitations	17		0	0	0	0	~		8			15
0	142	0			Poverty	12		0	1	0	8.3	0		1			4
Yes Factors	Encounters	% Encounters with Factors			Near Poverty	9		0	1	0	11.1	0		2			7
142	142	100			Family Care Demands	9		0	2	0	22.2	0		6			6
					Transportation Issues	8		0	0	0	0	~		3			6
					Unstable Housing	7		0	0	0	0	~		2			3
Visit Type	Count	Factors	Avg Factors/Encounter		Unstable Work Schedule	7		0	1	0	14.3	0		3			4
OBGYN	4	13	3.25		Cultural Barriers	5		1	0	20	0	~		2			4
Saturday	1	2	2		Immigrant Status	5		0	0	0	0	~		1			2
Child	19	33	1.74		Food Insecurity	2		0	0	0	0	~		2			1
All Other	62	94	1.52		Homelessness	2		0	0	0	0	~		1			2
					Migrant Status	1		0	0	0	0	~		1			1
					Other	0		~	~	~	~	~		~	~		~	~
					TOTAL	142		1	8	0.7	5.6	12.5		71	50		93	65.5
